# Supplementary material
Source: MDPI journal article supplement (https://www.mdpi.com/2227-9040/10/1/19)
Supplement: s1 [file s1]

## **Electronic Supporting Information**

**Rational Design and Synthesis of Large Stokes Shift 2,6-Sulphur-Disubstituted  
BODIPYs for Cell Imaging**

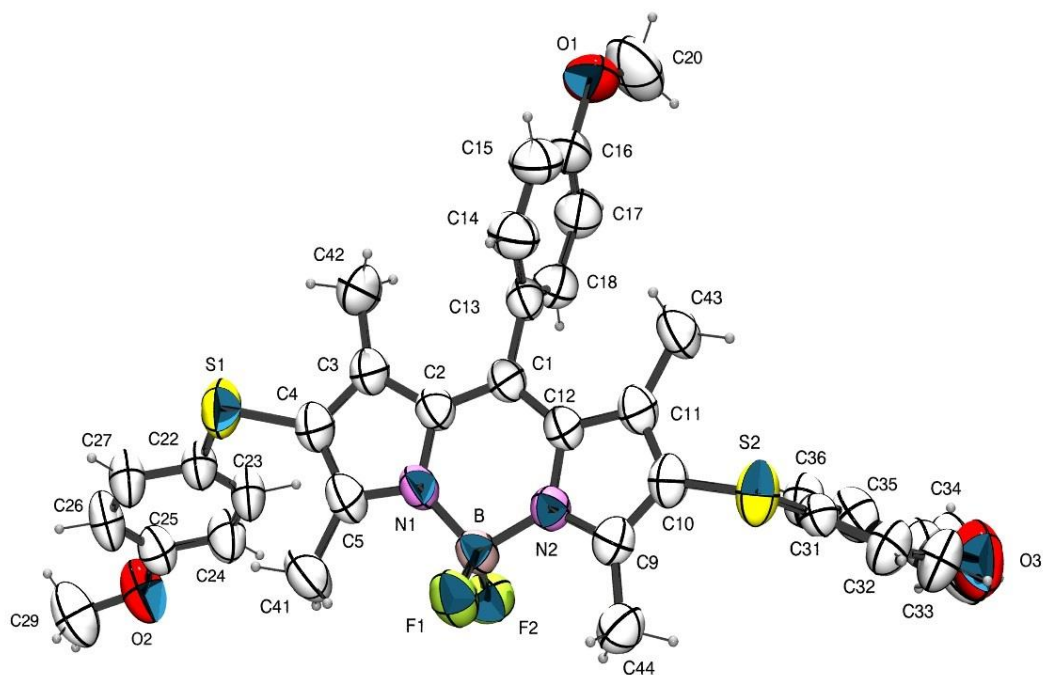

**Figure S1.** ORTEP-3 projection of **2d**, showing the atom numbering and displacement ellipsoids at the 50% probability level.

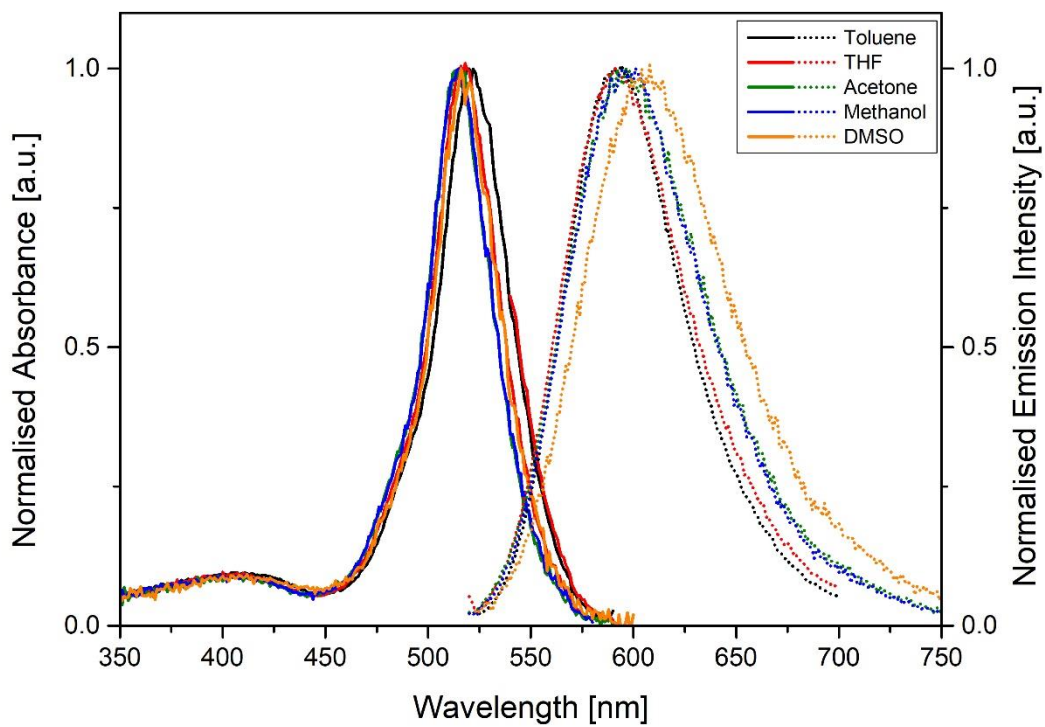

**Figure S2.** Normalized absorption and emission spectra of BODIPY **2a** in different organic solvents.

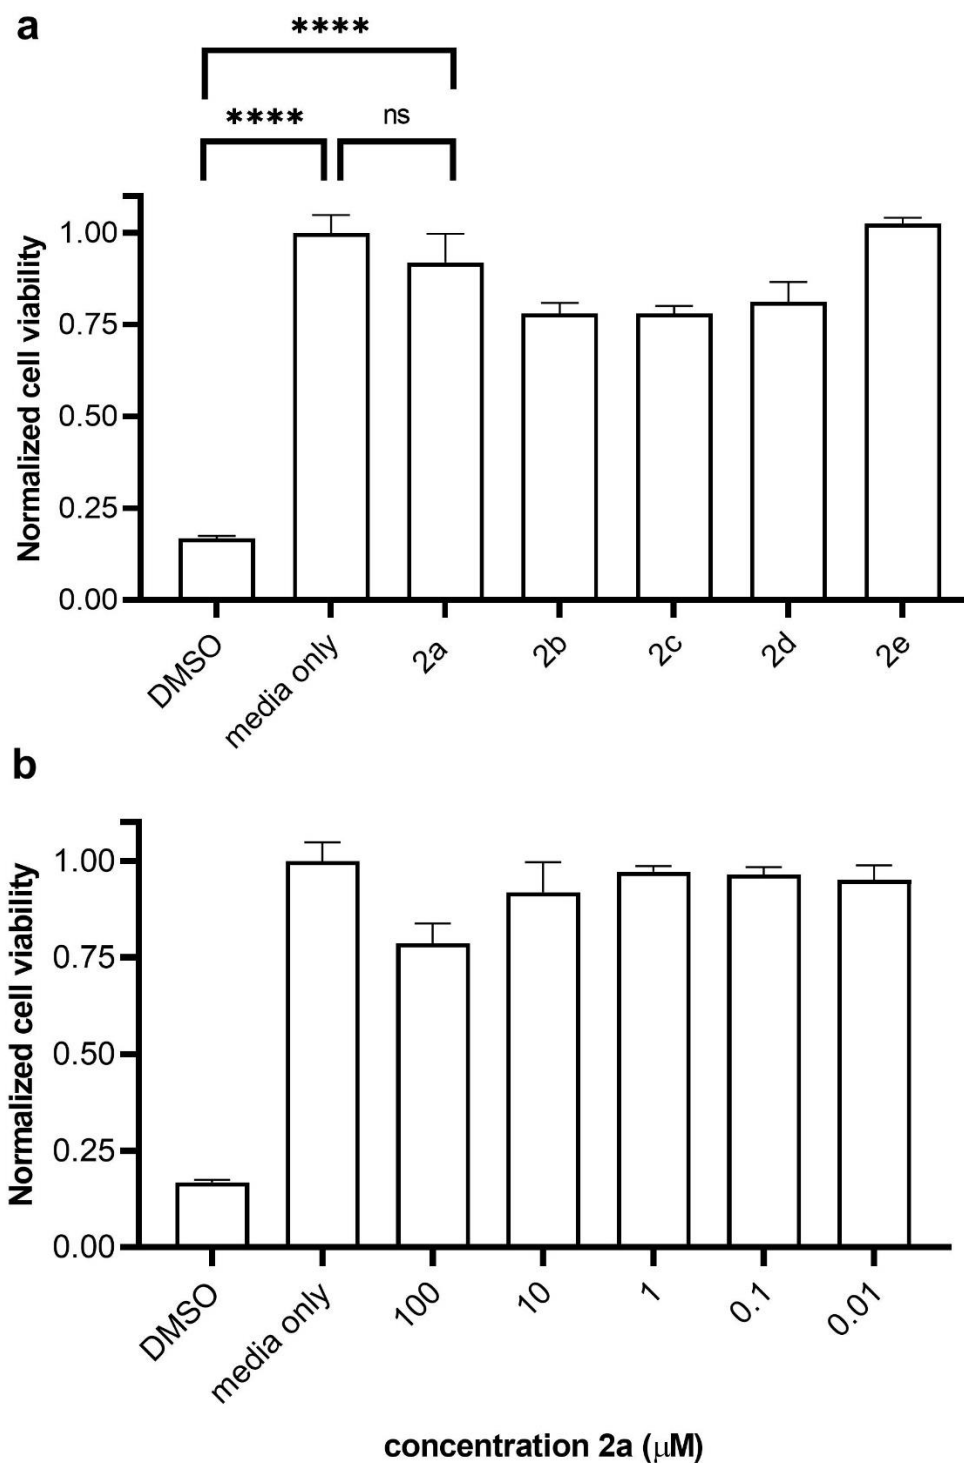

**Figure S3.** Viability assays in MDA-MB-231 cells. a) Cell viability after incubation with compounds **2a-2e** (all at 10 μM). Values were normalized against cells incubated in media only. b) Cell viability after incubation with compound **2a** at different concentrations. Values were normalized against cells incubated in media only. All values are represented as means±SD (n=3). P values were determined by one-way ANOVA using multiple comparisons (\*\*\*\* for  $p < 0.0001$ , ns for  $p > 0.05$ ).

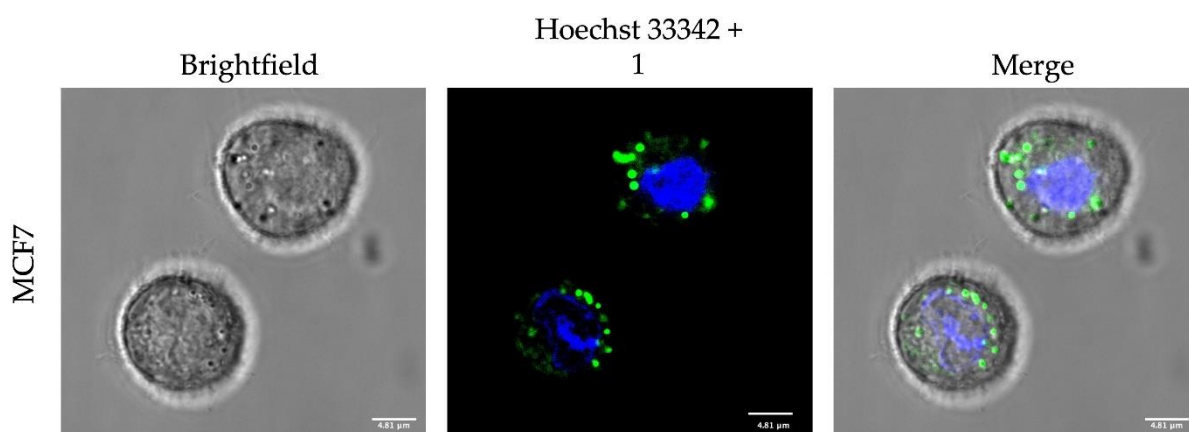

**Figure S4.** Confocal fluorescence microscopy images of compound **1** (10  $\mu$ M,  $\lambda_{exc}$  = 488 nm,  $\lambda_{em}$  = 500-550 nm) in MCF7 (breast cancer cells). Cells were counterstained with Hoechst 33342 for nuclear labelling. Scale bar: 5  $\mu$ m.

**Table S1.** ORTEP-3 projection of compound **2d**, showing the atom numbering and displacement ellipsoids at the 50% probability level.

| Compound                                | 2d                                                                                           |
|-----------------------------------------|----------------------------------------------------------------------------------------------|
| CCDC#                                   | 2122460                                                                                      |
| Formula                                 | C <sub>34</sub> H <sub>33</sub> BF <sub>2</sub> N <sub>2</sub> O <sub>3</sub> S <sub>2</sub> |
| D <sub>calc.</sub> / g cm <sup>-3</sup> | 1.334                                                                                        |
| μ/mm <sup>-1</sup>                      | 0.219                                                                                        |
| Formula Weight                          | 630.55                                                                                       |
| Colour                                  | clear light colourless                                                                       |
| Shape                                   | block                                                                                        |
| Size/mm <sup>3</sup>                    | 0.22×0.20×0.15                                                                               |
| T/K                                     | 293(2)                                                                                       |
| Crystal System                          | monoclinic                                                                                   |
| Space Group                             | P2 <sub>1</sub> /c                                                                           |
| a/Å                                     | 15.3643(9)                                                                                   |
| b/Å                                     | 10.9746(7)                                                                                   |
| c/Å                                     | 18.6763(10)                                                                                  |
| α/°                                     | 90                                                                                           |
| β/°                                     | 94.625(5)                                                                                    |
| γ/°                                     | 90                                                                                           |
| V/Å <sup>3</sup>                        | 3138.9(3)                                                                                    |
| Z                                       | 4                                                                                            |
| Z'                                      | 1                                                                                            |
| Wavelength/Å                            | 0.71073                                                                                      |
| Radiation type                          | Mo K                                                                                         |
| Θ <sub>min</sub> /°                     | 2.578                                                                                        |
| Θ <sub>max</sub> /°                     | 26.499                                                                                       |
| Measured Refl.                          | 15703                                                                                        |
| Independent Refl.                       | 6510                                                                                         |
| Reflections with I > 2(I)               | 4195                                                                                         |
| R <sub>int</sub>                        | 0.0308                                                                                       |
| Parameters                              | 404                                                                                          |
| Restraints                              | 0                                                                                            |
| Largest Peak                            | 0.429                                                                                        |
| Deepest Hole                            | -0.243                                                                                       |
| GooF                                    | 1.014                                                                                        |
| wR <sub>2</sub> (all data)              | 0.1477                                                                                       |
| wR <sub>2</sub>                         | 0.1223                                                                                       |
| R <sub>1</sub> (all data)               | 0.0844                                                                                       |
| R <sub>1</sub>                          | 0.0489                                                                                       |

## NMR spectra

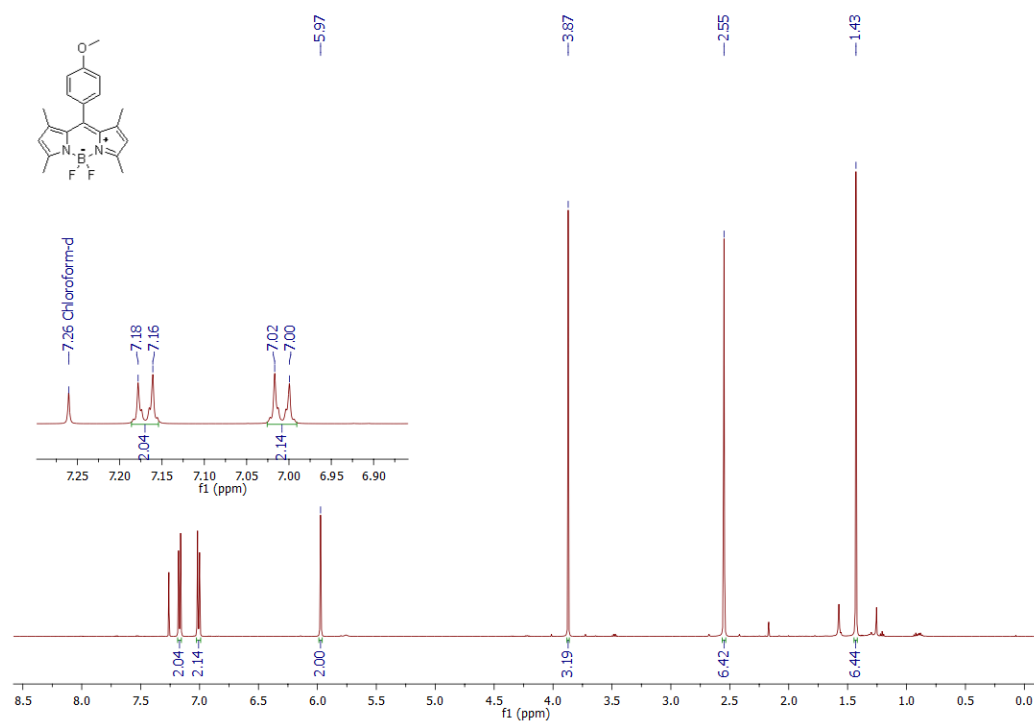

<sup>1</sup>H NMR Spectrum (500 MHz, CDCl<sub>3</sub>) of compound 1

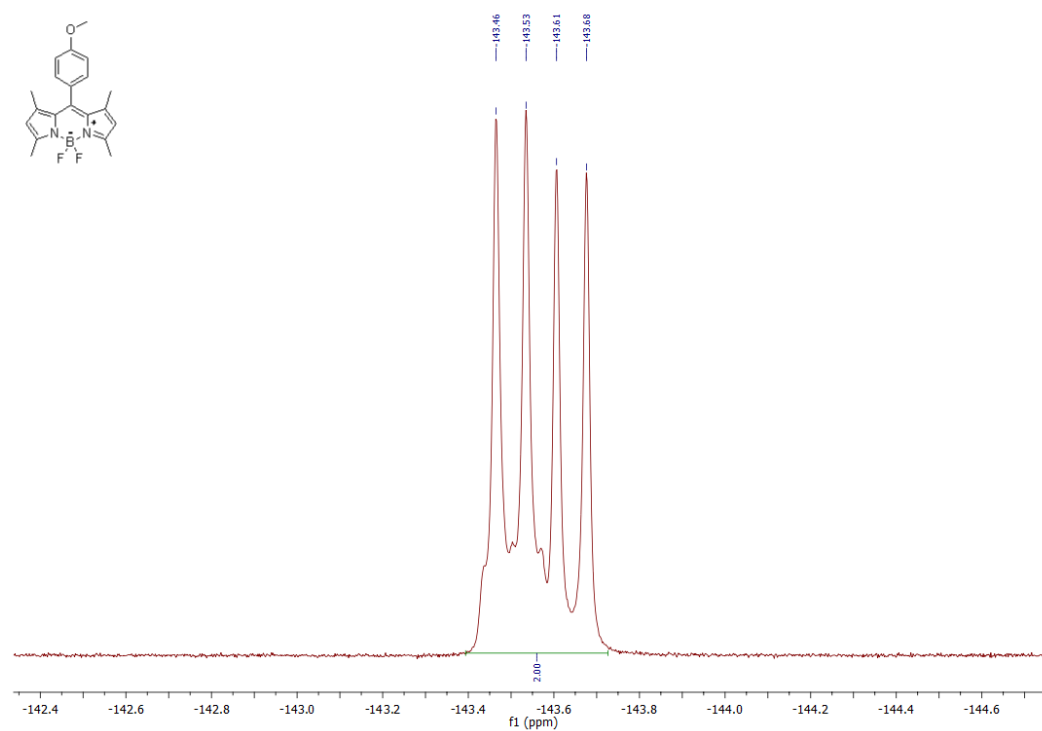

<sup>19</sup>F NMR Spectrum (470 MHz, CDCl<sub>3</sub>) of compound 1

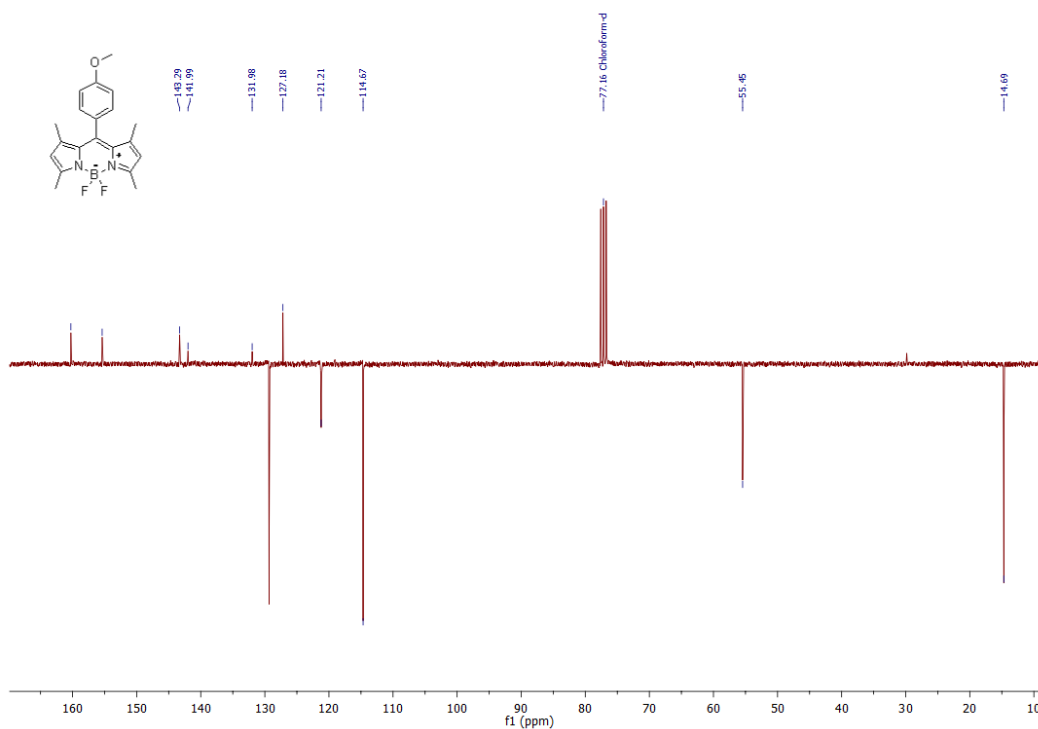

<sup>13</sup>C-APT NMR Spectrum (75.0 MHz, CDCl<sub>3</sub>) of compound **1**

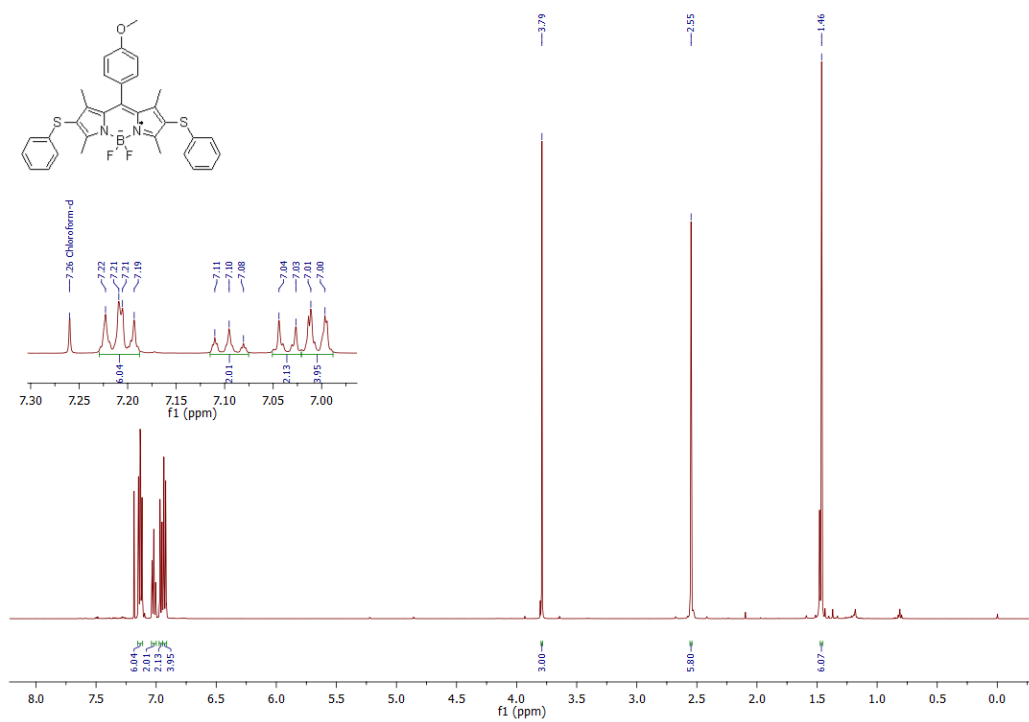

<sup>1</sup>H NMR Spectrum (500 MHz, CDCl<sub>3</sub>) of compound **2a**

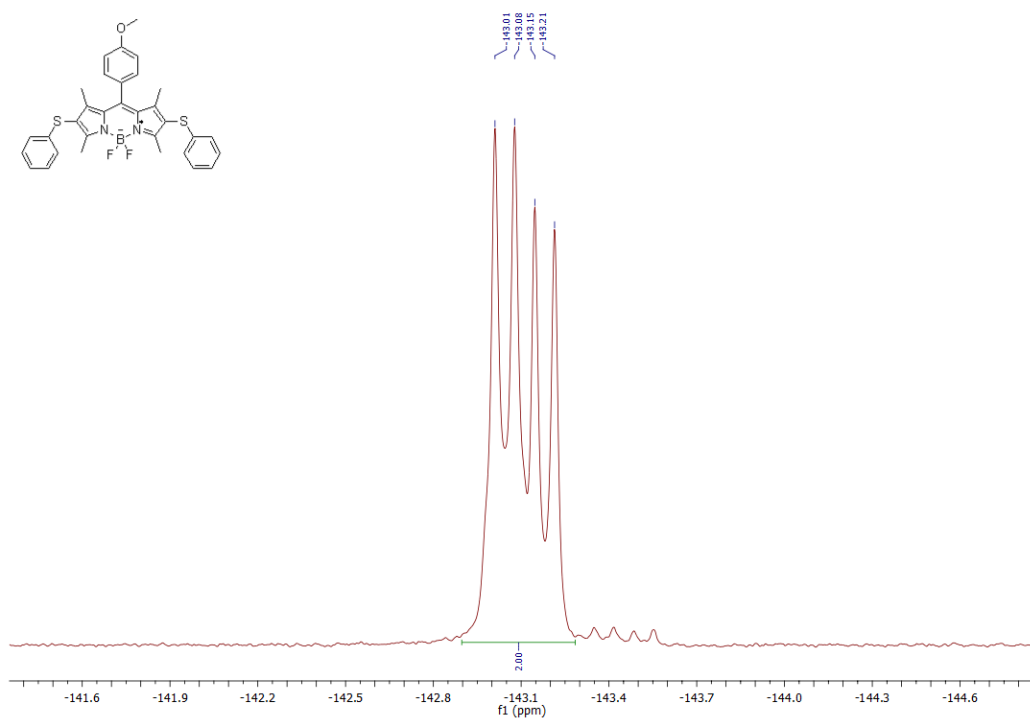

$^{19}\text{F}$  NMR Spectrum (470 MHz,  $\text{CDCl}_3$ ) of compound **2a**

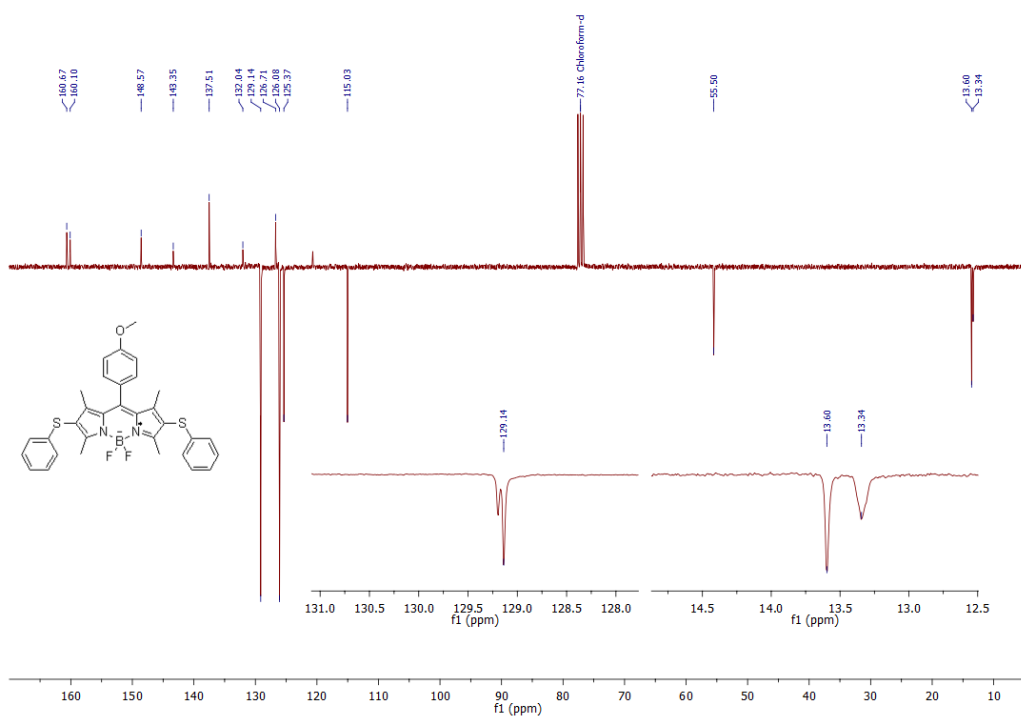

$^{13}\text{C}$ -APT NMR Spectrum (75,0 MHz,  $\text{CDCl}_3$ ) of compound **2a**



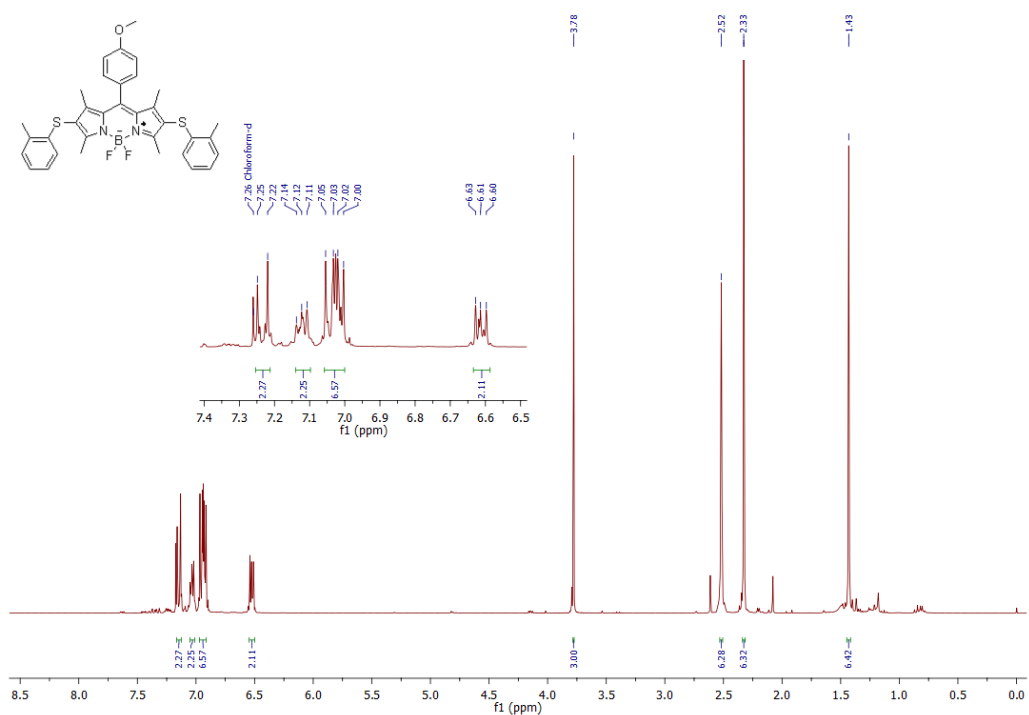

**<sup>1</sup>H NMR Spectrum (300 MHz, CDCl<sub>3</sub>) of compound **2b****

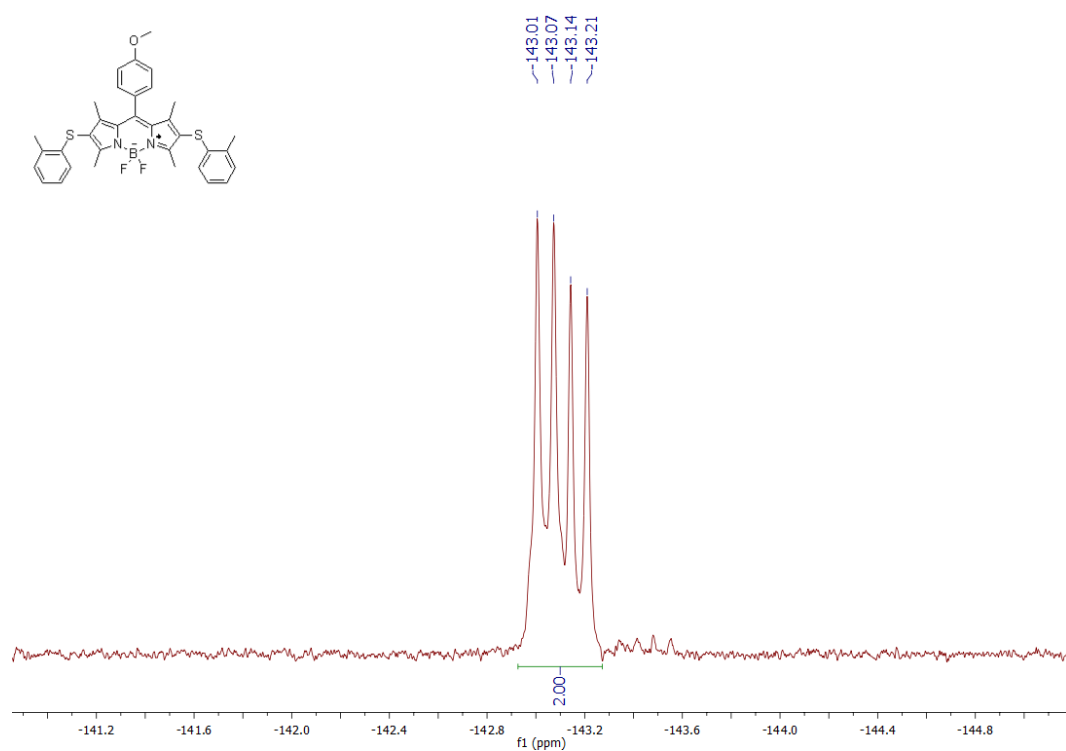

**<sup>19</sup>F NMR Spectrum (470 MHz, CDCl<sub>3</sub>) of compound **2b****

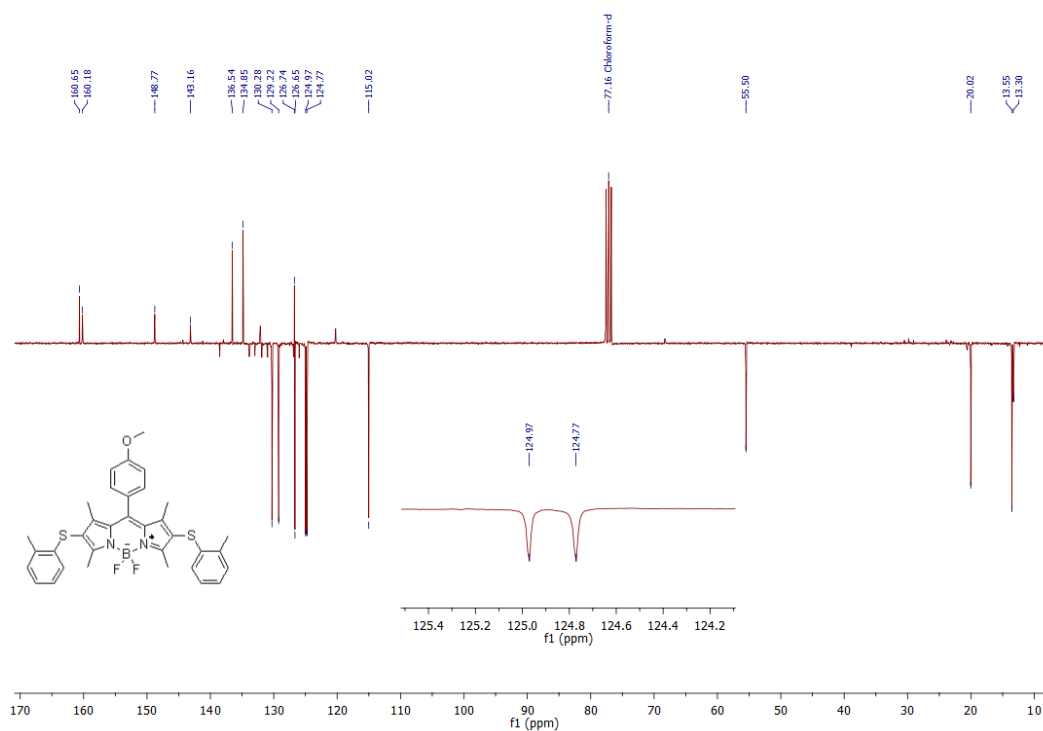

<sup>13</sup>C-APT NMR Spectrum (75,0 MHz, CDCl<sub>3</sub>) of compound **2b**

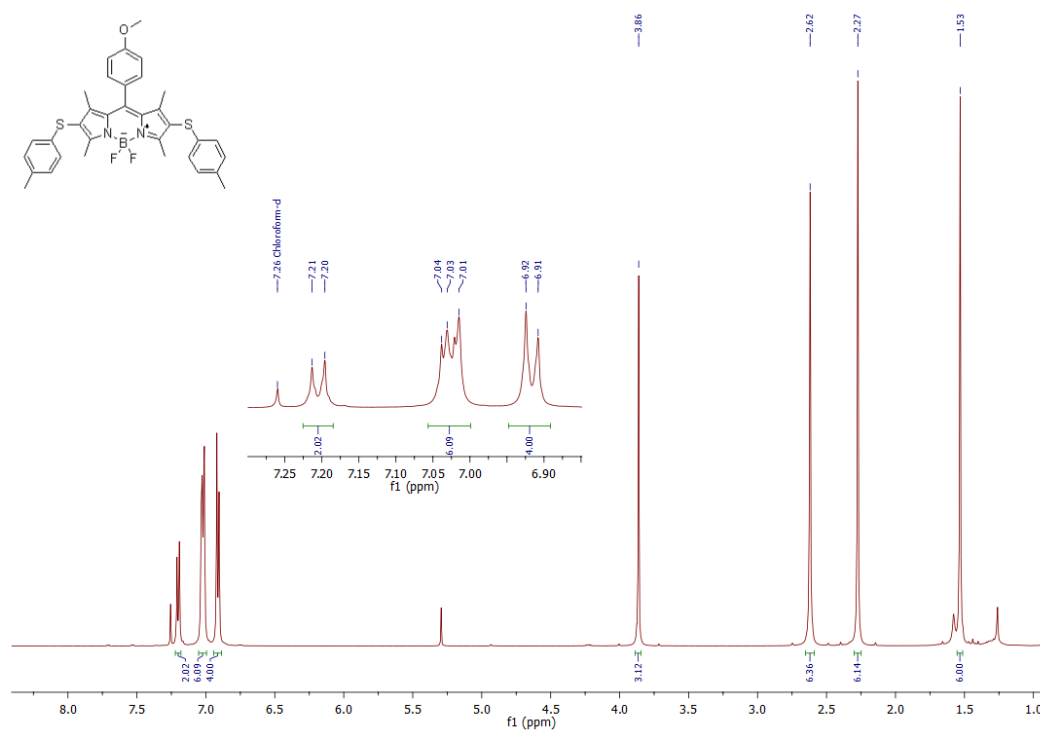

<sup>1</sup>H NMR Spectrum (500 MHz, CDCl<sub>3</sub>) of compound **2c**

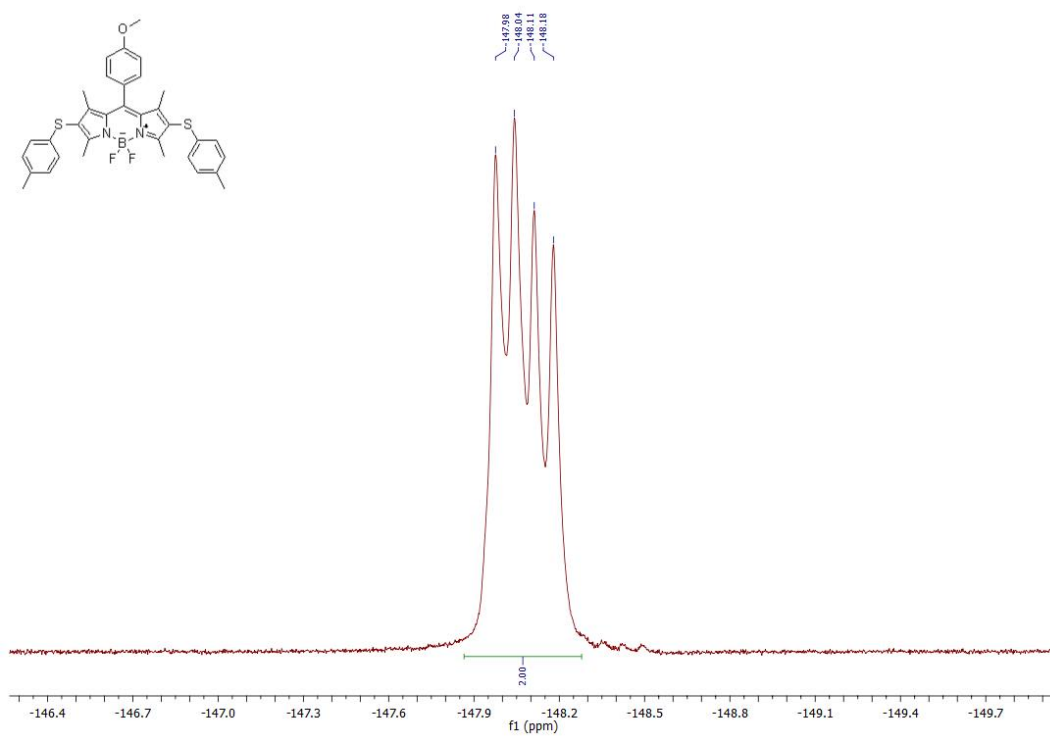

$^{19}\text{F}$  NMR Spectrum (470 MHz,  $\text{CDCl}_3$ ) of compound **2c**

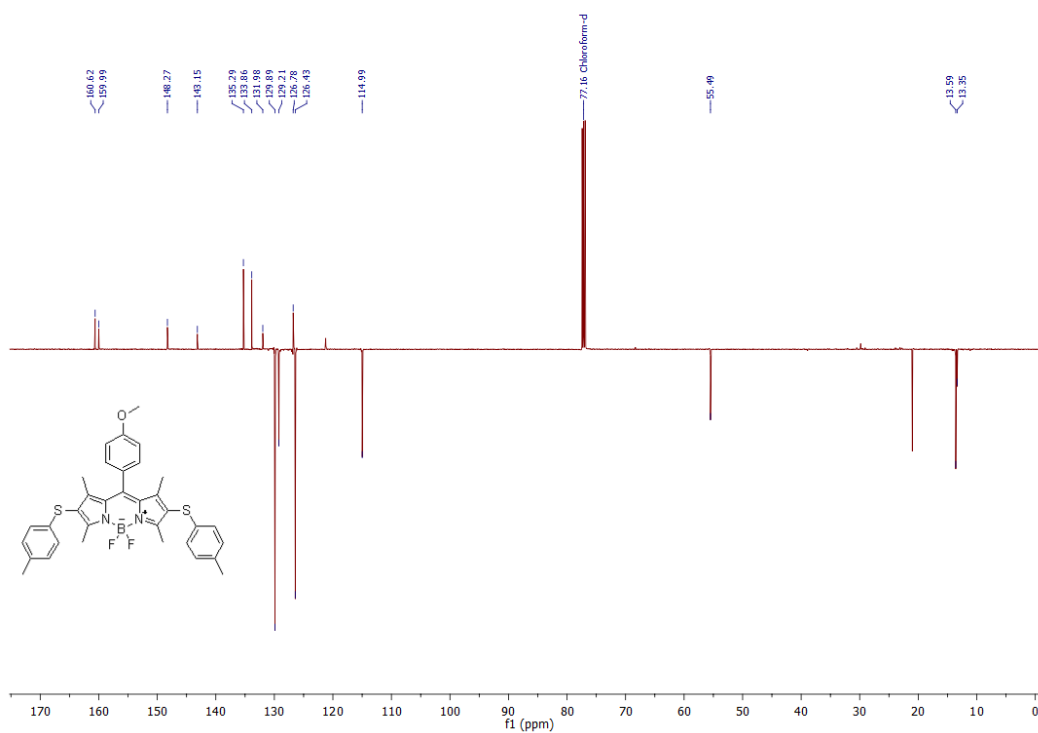

$^{13}\text{C}$ -APT NMR Spectrum (125.0 MHz,  $\text{CDCl}_3$ ) of compound **2c**

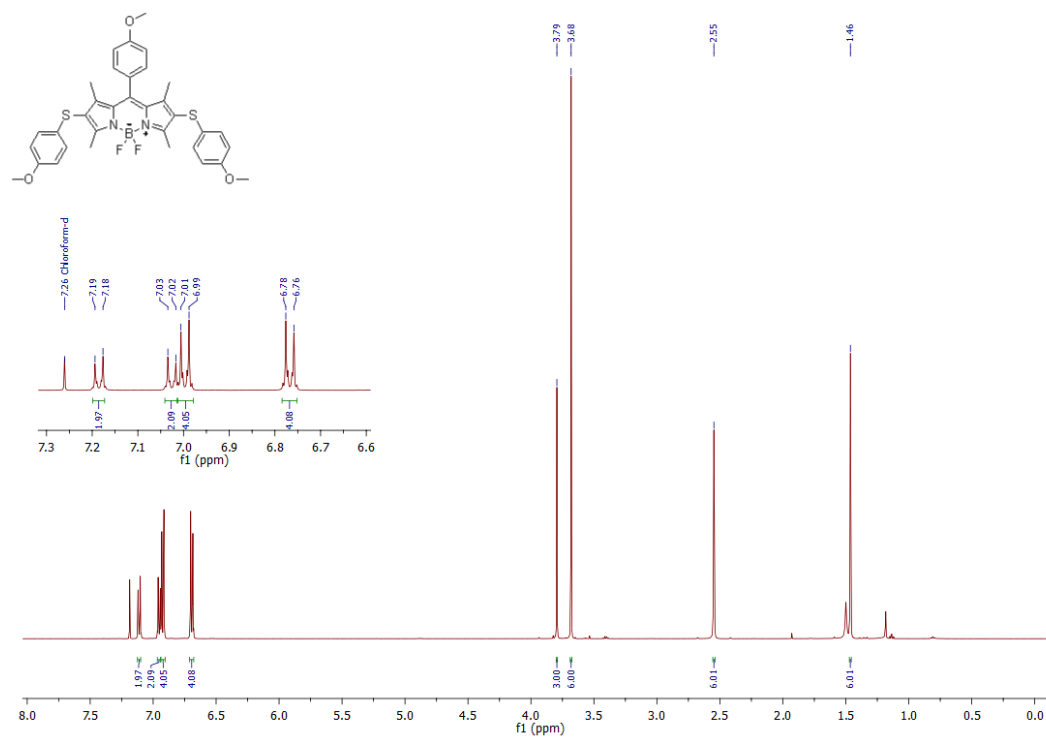

**<sup>1</sup>H NMR Spectrum (500 MHz, CDCl<sub>3</sub>) of compound **2d****

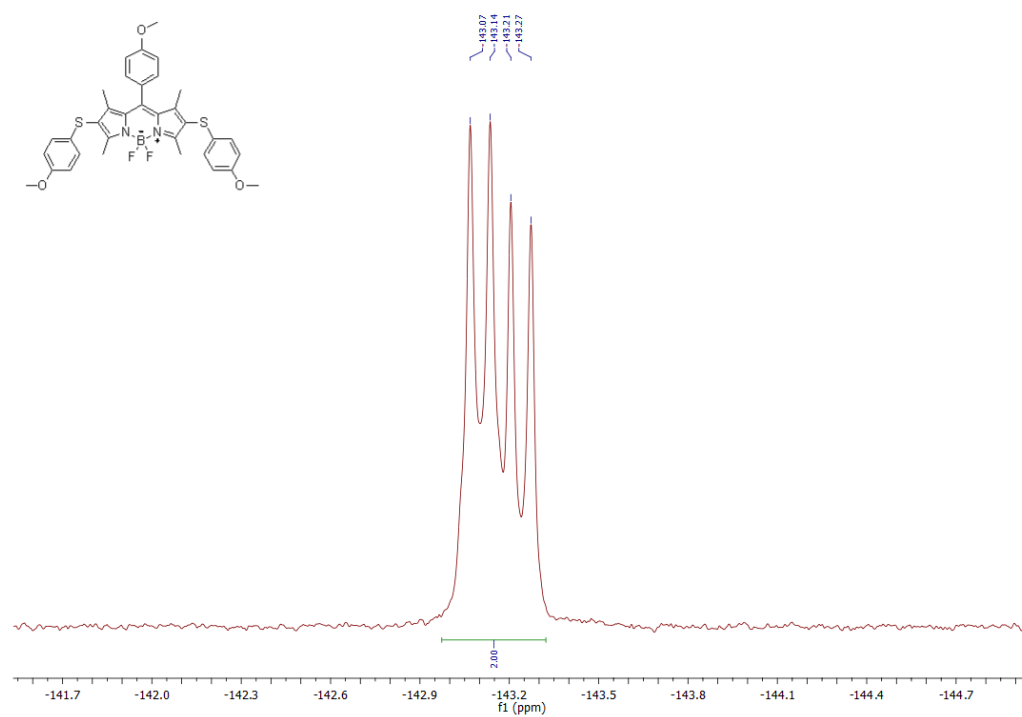

**<sup>19</sup>F NMR Spectrum (470 MHz, CDCl<sub>3</sub>) of compound **2d****

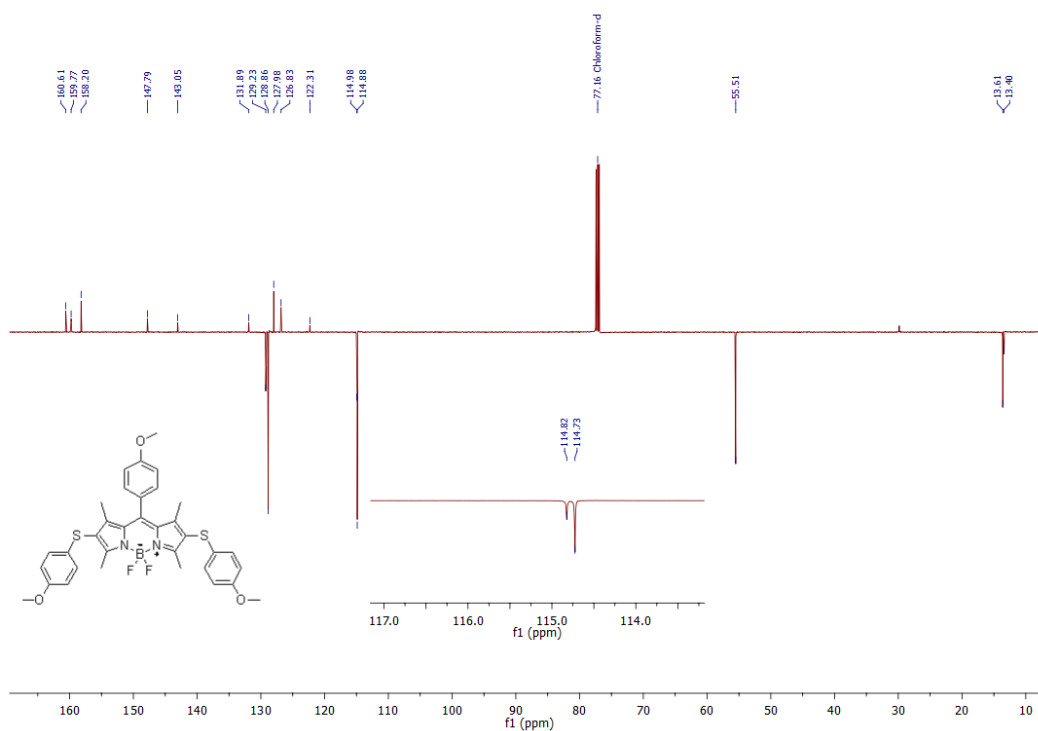

**<sup>13</sup>C-APT NMR Spectrum (125,0 MHz, CDCl<sub>3</sub>) of compound **2d****

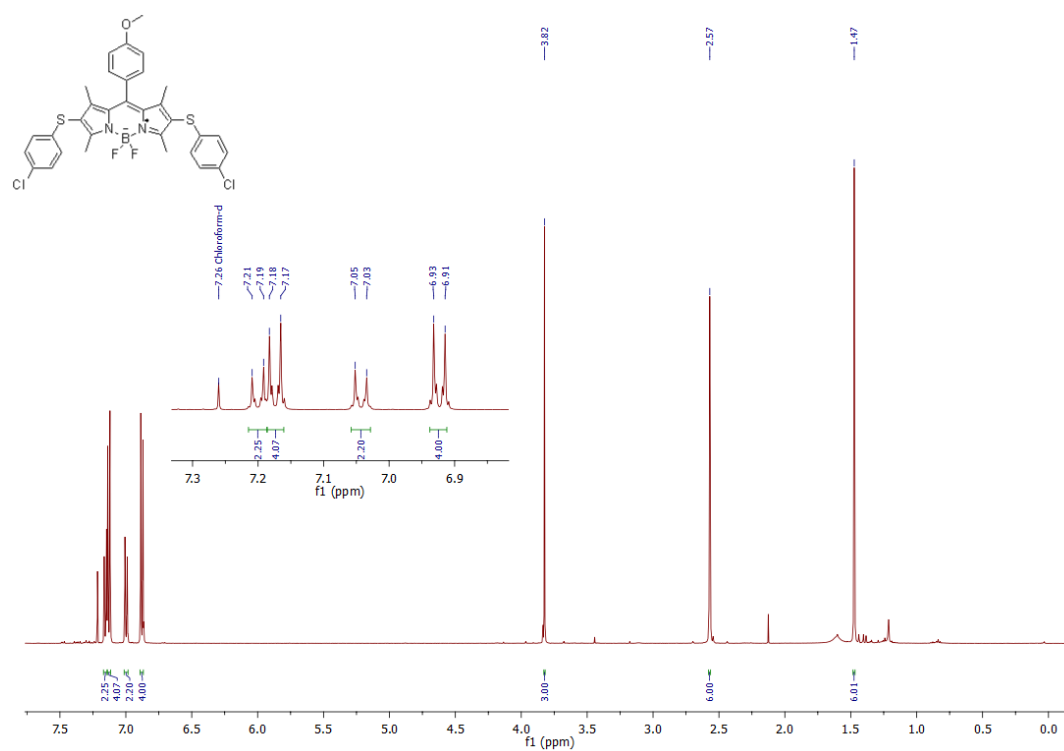

**<sup>1</sup>H NMR Spectrum (500 MHz, CDCl<sub>3</sub>) of compound **2e****

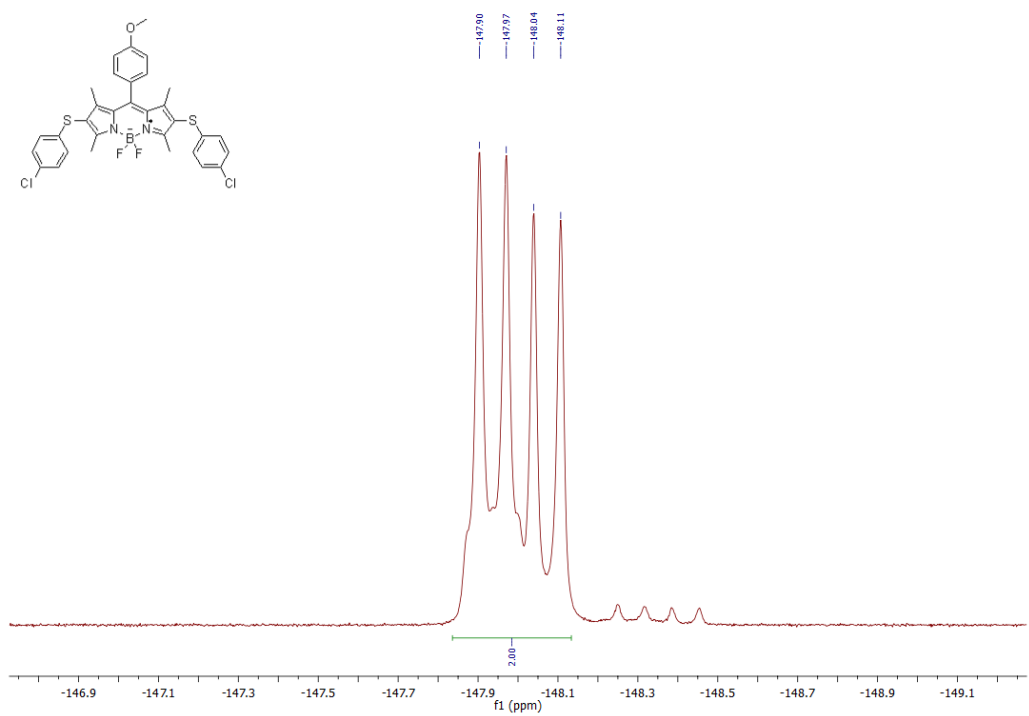

<sup>19</sup>F NMR Spectrum (470 MHz, CDCl<sub>3</sub>) of compound **2e**

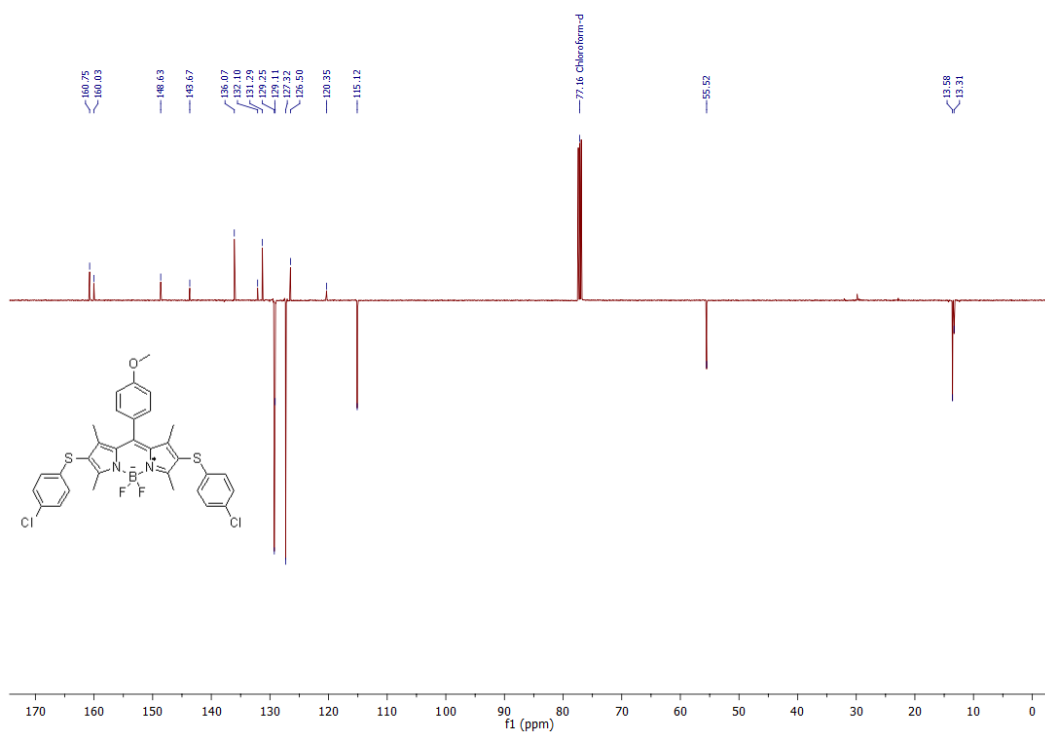

<sup>13</sup>C-APT NMR Spectrum (125,0 MHz, CDCl<sub>3</sub>) of compound **2e**

## HRMS Data

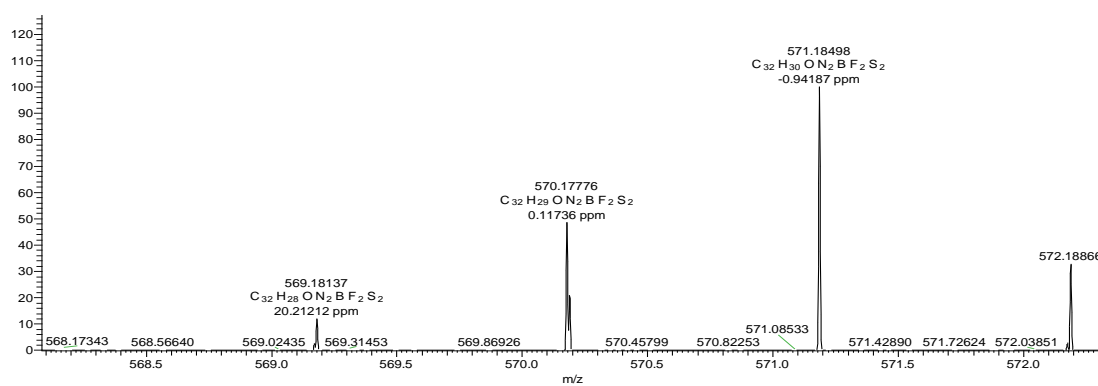

## HRMS (ESI<sup>+</sup>) of compound **2a**

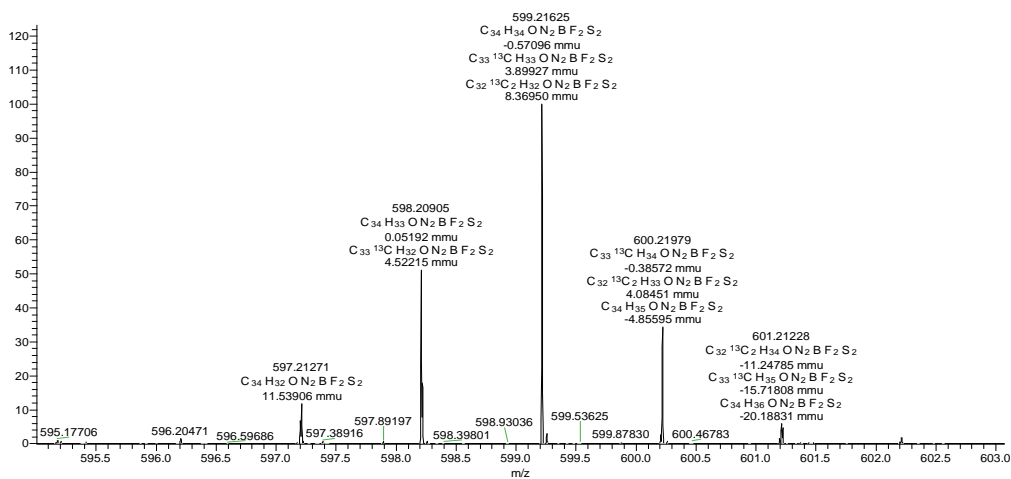

## HRMS (ESI<sup>+</sup>) of compound **2b**

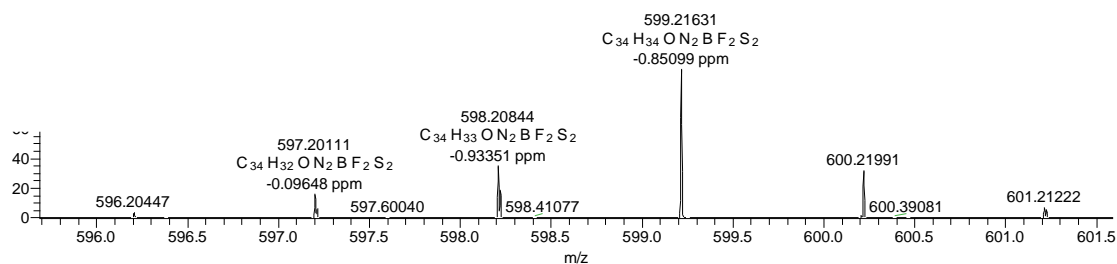

## HRMS (ESI<sup>+</sup>) of compound **2c**

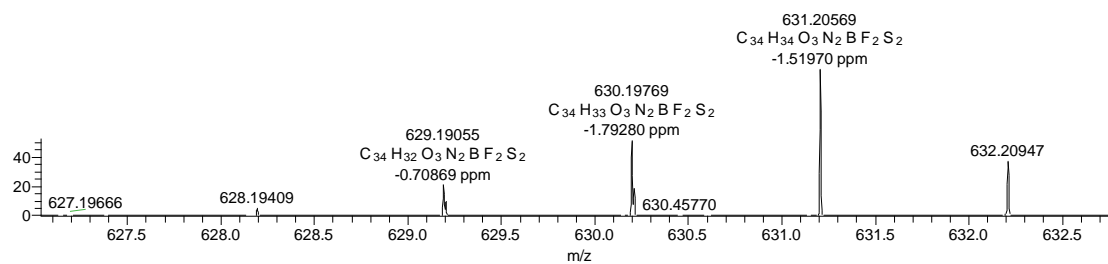

HRMS (ESI<sup>+</sup>) of compound **2d**

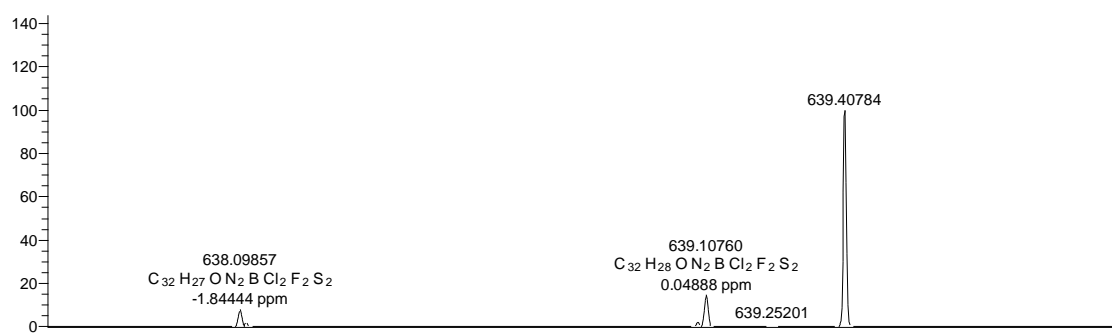

HRMS (ESI<sup>+</sup>) of compound **2e**
